# Supplementary material for: Providing quality-of-service for frequency-aware Wi-Fi using OFDM-based variable-length Bloom filters
Source: Springer Nature journal article supplement (doi:10.1186/1687-1499-2014-152), 2014-09-15
Supplement: 13638_2013_972_MOESM2_ESM.pdf [file 13638_2013_972_MOESM2_ESM.pdf]

**a**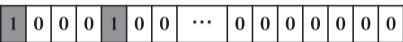

STA1's signature of length 2 ( $s_1$ )

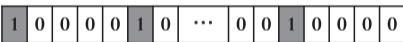

STA2's signature of length 3 ( $s_2$ )

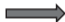

Q-CRQ Frame

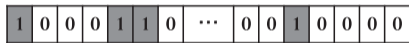

Combined signature (Resulting Bloom filter)

**b**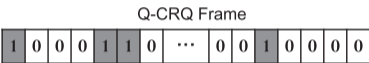

Combined signature (Resulting Bloom filter)

Test if  $s_i$ , ( $s_i \in S$ ,  $1 \leq i \leq N$ )  
is in the Bloom filter

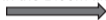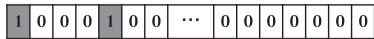

STA1's signature of length 2 ( $s_1$ )

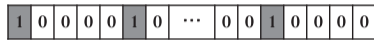

STA2's signature of length 3 ( $s_2$ )

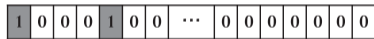

False Positive if  $\exists s_{i \neq 1,2} \in S$

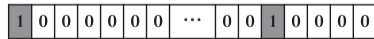

False Positive
