# Supplementary material for: Providing quality-of-service for frequency-aware Wi-Fi using OFDM-based variable-length Bloom filters
Source: Springer Nature journal article supplement (doi:10.1186/1687-1499-2014-152), 2014-09-15

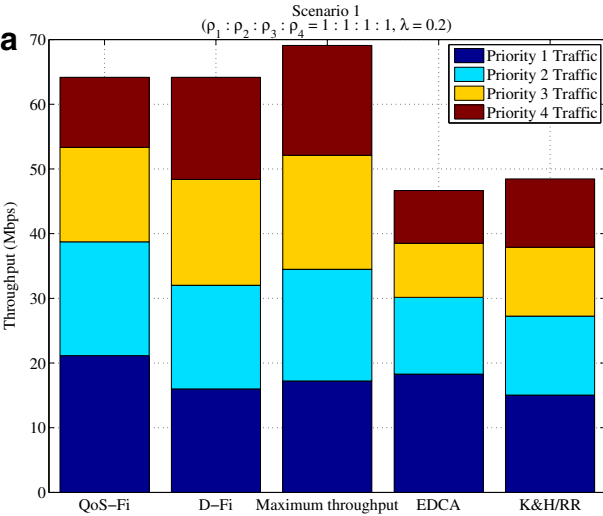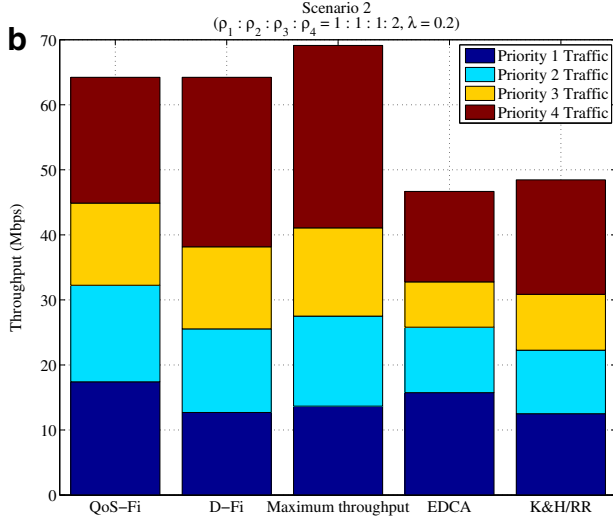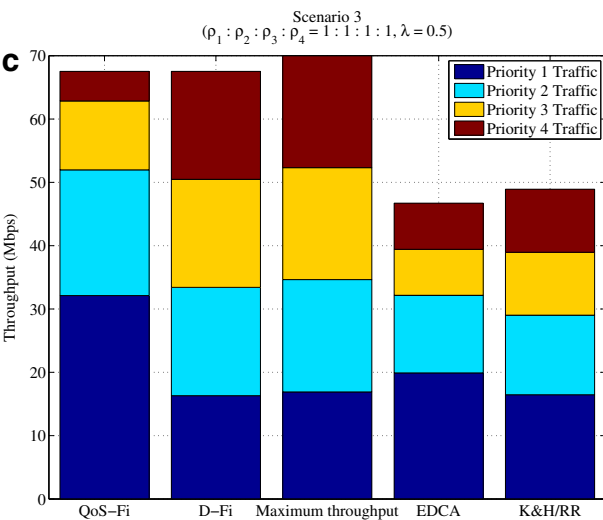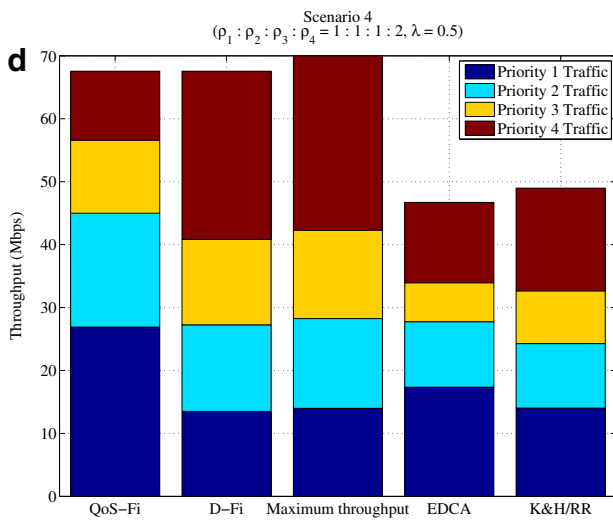

Supplement: 13638_2013_972_MOESM8_ESM.pdf [file 13638_2013_972_MOESM8_ESM.pdf]
