# Supplementary material for: Providing quality-of-service for frequency-aware Wi-Fi using OFDM-based variable-length Bloom filters
Source: Springer Nature journal article supplement (doi:10.1186/1687-1499-2014-152), 2014-09-15

Scenario 1

 $(\rho_1 : \rho_2 : \rho_3 : \rho_4 = 1 : 1 : 1 : 1, \lambda = 0.2)$ 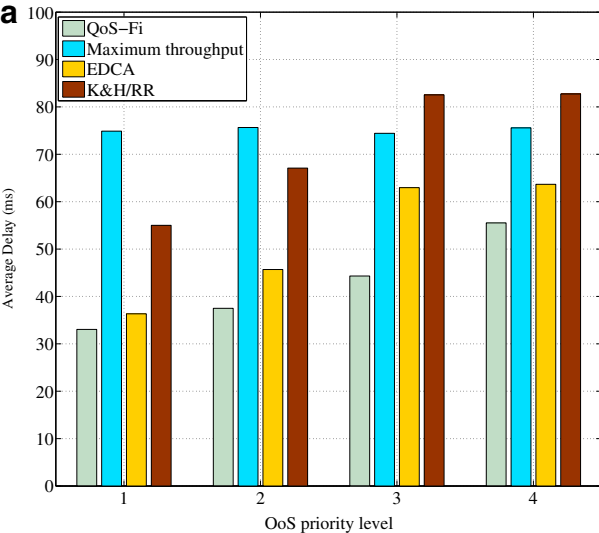

Scenario 2

 $(\rho_1 : \rho_2 : \rho_3 : \rho_4 = 1 : 1 : 1 : 2, \lambda = 0.2)$ 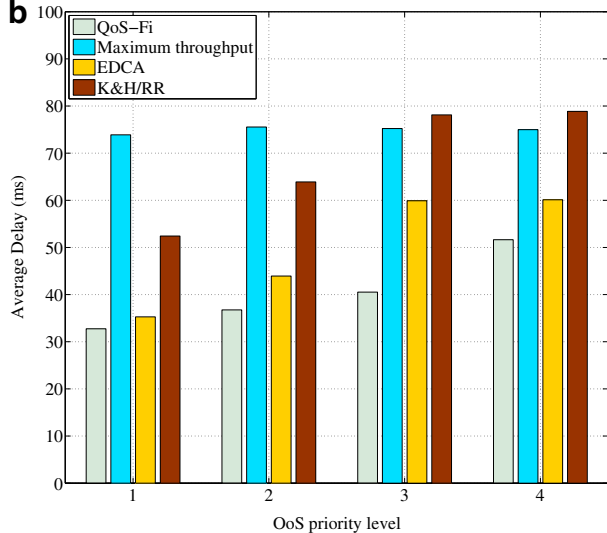

Scenario 3

 $(\rho_1 : \rho_2 : \rho_3 : \rho_4 = 1 : 1 : 1 : 1, \lambda = 0.5)$ 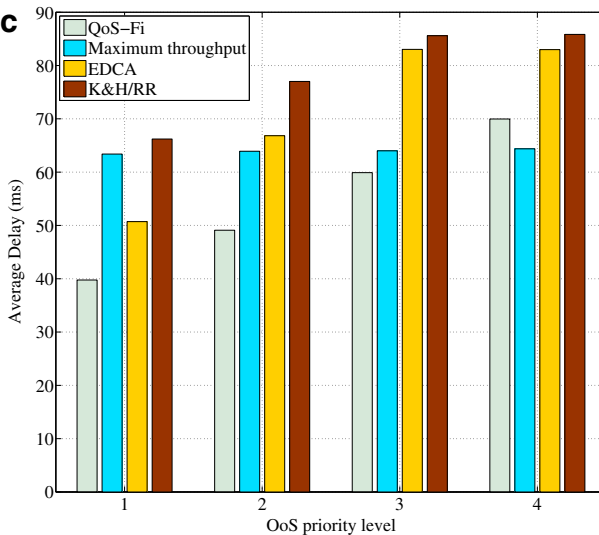

Scenario 4

 $(\rho_1 : \rho_2 : \rho_3 : \rho_4 = 1 : 1 : 1 : 2, \lambda = 0.5)$ 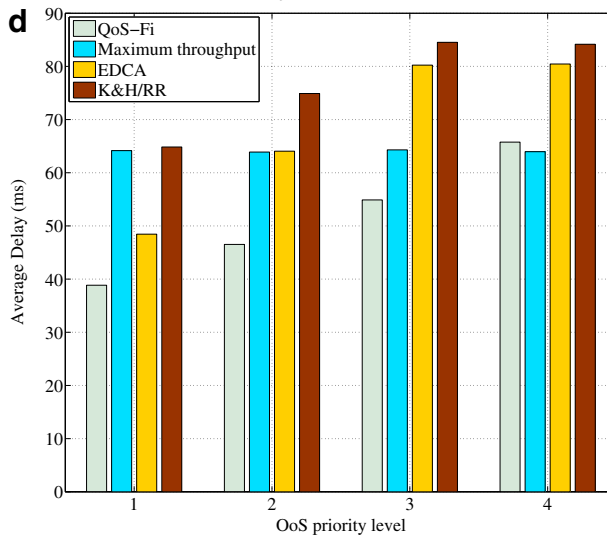

Supplement: 13638_2013_972_MOESM9_ESM.pdf [file 13638_2013_972_MOESM9_ESM.pdf]
